# Supplementary material for: The implementation of HTA in medicine pricing and reimbursement policies in Indonesia: Insights from multiple stakeholders
Source: PubMed Central journal article supplement (PMC6881021; doi:10.1371/journal.pone.0225626), 2019-11-27
Supplement: pone.0225626.s003.pdf [file pone.0225626.s003.pdf]

**S2 Table.** Overview of the recruitment process

| Type of stakeholders         | Sent letter | Reaction to letter | Interviews | Cancelled participation before interview, after receiving interview guide | Cancelled participation during interview | Not possible to schedule interview time | No reaction within 10 months |
|------------------------------|-------------|--------------------|------------|---------------------------------------------------------------------------|------------------------------------------|-----------------------------------------|------------------------------|
| WHO members                  | 2           | 2                  | 1          | 0                                                                         | 0                                        | 1                                       | 0                            |
| HTA committee                | 3           | 2                  | 2          | 0                                                                         | 0                                        | 0                                       | 1                            |
| National formulary committee | 3           | 1                  | 1          | 0                                                                         | 0                                        | 0                                       | 2                            |
| NHI Agency                   | 3           | 3                  | 2          | 0                                                                         | 0                                        | 1                                       | 0                            |
| Pharmaceutical industry      | 4           | 3                  | 1          | 0                                                                         | 0                                        | 2                                       | 1                            |
| Physicians                   | 12          | 10                 | 6          | 1                                                                         | 3                                        | 0                                       | 2                            |
| Pharmacists                  | 15          | 15                 | 6          | 5                                                                         | 4                                        | 0                                       | 0                            |
| Patients                     | 9           | 9                  | 6          | 3                                                                         | 0                                        | 0                                       | 0                            |
| <b>TOTAL</b>                 | <b>51</b>   | <b>45</b>          | <b>25</b>  | <b>9</b>                                                                  | <b>7</b>                                 | <b>4</b>                                | <b>6</b>                     |
