# Supplementary material for: The implementation of HTA in medicine pricing and reimbursement policies in Indonesia: Insights from multiple stakeholders
Source: PubMed Central journal article supplement (PMC6881021; doi:10.1371/journal.pone.0225626), 2019-11-27
Supplement: pone.0225626.s004.pdf [file pone.0225626.s004.pdf]

**S3 Table.** Saturation checklist on sub-theme

| No | Themes                                                                         | Policy Makers |   |   |   |   |   | Medicine Supplier | Physicians |   |   |   |   |   | Pharmacist |   |   |   |   |   | Patients |   |   |   |   |   |
|----|--------------------------------------------------------------------------------|---------------|---|---|---|---|---|-------------------|------------|---|---|---|---|---|------------|---|---|---|---|---|----------|---|---|---|---|---|
|    |                                                                                | 1             | 2 | 3 | 4 | 5 | 6 | 1                 | 1          | 2 | 3 | 4 | 5 | 6 | 1          | 2 | 3 | 4 | 5 | 6 | 1        | 2 | 3 | 4 | 5 | 6 |
| 1  | <b>Attitude</b>                                                                |               |   |   |   |   |   |                   |            |   |   |   |   |   |            |   |   |   |   |   |          |   |   |   |   |   |
|    | Agree                                                                          | +             | + | + | + | + | + | +                 | +          | + | + | + | + | + | +          | + | + | + | + | + | +        | + | + | + | + | + |
| 2  | <b>Advantages</b>                                                              |               |   |   |   |   |   |                   |            |   |   |   |   |   |            |   |   |   |   |   |          |   |   |   |   |   |
|    | To Provide scientific evidence                                                 | +             | + | + | + | + | + | +                 | +          | + |   | + | + | + |            |   | + | + |   |   |          |   |   |   |   |   |
|    | To Provide a ground for fair pricing in the e-Catalogue                        |               |   |   |   |   |   | +                 |            | + |   |   |   | + |            | + |   |   | + |   |          |   |   | + |   |   |
|    | To reassure the medicines listed in the NF were the best choice                | +             | + | + | + |   | + |                   | +          | + | + | + | + | + | +          | + | + |   | + | + | +        | + | + | + |   |   |
| 3  | <b>Disadvantages</b>                                                           |               |   |   |   |   |   |                   |            |   |   |   |   |   |            |   |   |   |   |   |          |   |   |   |   |   |
|    | Increase the cost of developing the e-Catalogue and the NF                     | +             |   |   |   |   |   |                   |            |   | + | + |   | + |            |   | + | + | + |   |          |   | + |   |   |   |
|    | Complicated bureaucracy                                                        | +             |   | + |   |   | + |                   |            |   |   |   |   |   |            |   |   |   |   |   |          |   |   |   |   |   |
|    | Lengthy Process for renewing medicines listed in the e-Catalogue and the NF    | +             |   | + |   |   | + |                   | +          | + | + |   |   | + |            |   | + |   |   |   |          |   |   |   |   |   |
|    | No disadvantage                                                                |               | + |   | + | + |   | +                 |            |   |   |   |   |   | +          | + |   |   |   | + | +        | + |   | + |   |   |
| 4  | <b>Barriers</b>                                                                |               |   |   |   |   |   |                   |            |   |   |   |   |   |            |   |   |   |   |   |          |   |   |   |   |   |
|    | A lack of capability of local human resources                                  | +             | + | + | + | + | + | +                 | +          |   | + | + | + | + | +          |   |   | + | + | + |          |   |   |   |   |   |
|    | A lack of financial incentives                                                 | +             | + | + | + | + | + |                   |            |   | + |   |   |   |            |   | + |   |   |   | +        | + | + | + |   |   |
|    | A lack of a clear framework                                                    | +             | + |   |   |   | + | +                 |            | + |   |   |   | + | +          | + |   | + |   |   |          |   |   |   |   |   |
|    | Insufficient data                                                              | +             | + |   |   |   | + |                   |            |   |   |   |   |   | +          |   |   | + | + |   |          |   |   |   |   |   |
| 5  | <b>Possible solutions</b>                                                      |               |   |   |   |   |   |                   |            |   |   |   |   |   |            |   |   |   |   |   |          |   |   |   |   |   |
|    | To establish (inter)national network to build up capacity                      | +             | + | + | + |   | + |                   |            | + |   | + |   | + |            |   |   |   |   |   | +        | + | + | + |   |   |
|    | To introduce a clear HTA framework                                             | +             | + |   |   | + | + | +                 | +          |   | + |   | + | + |            | + | + | + | + | + | +        |   |   |   |   |   |
|    | To open HTA department, training, and association                              | +             | + | + | + |   |   |                   |            | + | + | + | + | + | +          |   |   |   |   | + |          |   |   |   |   |   |
| 6  | <b>Facilitating factors</b>                                                    |               |   |   |   |   |   |                   |            |   |   |   |   |   |            |   |   |   |   |   |          |   |   |   |   |   |
|    | The ambition to achieve UHC                                                    | +             | + | + |   | + | + |                   | +          | + | + | + | + | + |            |   | + |   | + | + | +        |   | + |   |   |   |
|    | The presence of legal framework to implement HTA in the e-Catalogue and the NF | +             | + | + | + | + | + |                   |            |   |   | + |   |   | +          | + |   | + | + | + |          |   |   | + |   |   |
|    | The demand for appropriate medicine policies.                                  | +             | + |   |   |   |   | +                 |            |   |   |   |   |   |            |   |   |   |   |   |          | + |   | + |   |   |
