# Supplementary material for: The implementation of HTA in medicine pricing and reimbursement policies in Indonesia: Insights from multiple stakeholders
Source: PubMed Central journal article supplement (PMC6881021; doi:10.1371/journal.pone.0225626), 2019-11-27
Supplement: pone.0225626.s008.pdf [file pone.0225626.s008.pdf]

**S3 File.** A formal waiver statements

|                                                                                                                                                                                                                                                                                                                                                  |                                                                                                                                                                                           |
|--------------------------------------------------------------------------------------------------------------------------------------------------------------------------------------------------------------------------------------------------------------------------------------------------------------------------------------------------|-------------------------------------------------------------------------------------------------------------------------------------------------------------------------------------------|
| <b>University Medical Center Groningen</b>                                                                                                                                                                                                                                                                                                       | P.O. Box 30 001, 9700 RB Groningen, The Netherlands                                                                                                                                       |
|                                                                                                                                                                                                                                                                                                                                                  | <b>Medical Ethics Review Board</b>                                                                                                                                                        |
|                                                                                                                                                                                                                                                                                                                                                  | Phone +31(0)50 361 42 04<br>Fax +31 (0)50 361 43 51<br>E-mail metc@umcg.nl<br>Website: metcgroningen.nl                                                                                   |
| To<br>R. Wasir, MSc.<br>University Medical Center Groningen<br>Department of Epidemiology FA 40                                                                                                                                                                                                                                                  | Ref. M18.236401                                                                                                                                                                           |
| <br>                                                                                                                                                                                                                                                                                                                                             |                                                                                                                                                                                           |
| Date: 30 <sup>th</sup> August 2018                                                                                                                                                                                                                                                                                                               |                                                                                                                                                                                           |
| Subject: <b>The role of Health Technology Assessment for Pharmaceutical Pricing and Reimbursement Policy in Indonesia.</b>                                                                                                                                                                                                                       |                                                                                                                                                                                           |
| <br>                                                                                                                                                                                                                                                                                                                                             |                                                                                                                                                                                           |
| Dear Sir,                                                                                                                                                                                                                                                                                                                                        |                                                                                                                                                                                           |
| I, the undersigned, declare that the submission entitled " <i>The role of Health Technology Assessment for Pharmaceutical Pricing and Reimbursement Policy in Indonesia</i> " by Wasir e.a., fulfils all the requirements for patient anonymity and is in agreement with regulations of our University Hospital for publication of patient data. |                                                                                                                                                                                           |
| Sincerely,                                                                                                                                                                                                                                                                                                                                       |                                                                                                                                                                                           |
|                                                                                                                                                                                                                                                               |                                                                                                                                                                                           |
| W.A. Kamps MD PhD<br>chairman                                                                                                                                                                                                                                                                                                                    |                                                                                                                                                                                           |
| <br>                                                                                                                                                                                                                                                                                                                                             |                                                                                                                                                                                           |
| cc                                                                                                                                                                                                                                                                                                                                               | -T.L. Feenstra MD, University Medical Center Groningen,<br>Department of Epidemiology FA 40<br>-E. Buskens, MD Ph.D, University Medical Center Groningen,<br>Department Epidemiology FA40 |
| <br>                                                                                                                                                                                                                                                                                                                                             |                                                                                                                                                                                           |
|                                                                                                                                                                                                                                                              |                                                                                                                                                                                           |
