# Supplementary material for: The implementation of HTA in medicine pricing and reimbursement policies in Indonesia: Insights from multiple stakeholders
Source: PLOS journal article supplement (doi:10.1371/journal.pone.0225626), 2019-11-27
Supplement: S2 (10.1371/journal.pone.0225626.s002) [file journal.pone.0225626.s002]

**S1 Table.** Initial list of themes and of questions

| No | Themes                                                           | No | Questions                                                                         |
|----|------------------------------------------------------------------|----|-----------------------------------------------------------------------------------|
| 1  | The development of medicine policy and national health insurance | 1  | Do you know how long HTA Committee, NF Committee, and NHI Agency existed?         |
|    |                                                                  | 2  | How many committee members?                                                       |
|    |                                                                  | 3  | What are their professions?                                                       |
|    |                                                                  | 4  | What are their duties?                                                            |
|    |                                                                  | 5  | Why are they existed?                                                             |
|    |                                                                  | 6  | What is the fuction of them?                                                      |
|    |                                                                  | 7  | What is the role of them to support UHC?                                          |
|    |                                                                  | 8  | How the NHI transform from the previous Health Insurance (Askes, Jamkesmas, etc)? |
|    |                                                                  | 9  | How many people are covered by NHI Agency currently?                              |
| 2  | Medicine Policy for UHC                                          | 10 | What should medicine policy(s) be created to support UHC?                         |
|    |                                                                  | 11 | Are you involved in creating NF and other medicine policy to support UHC?         |
| 3  | Users Perspective                                                | 12 | Do you know how the National Formulary is created?                                |
|    |                                                                  | 13 | Do you agree with the NF?                                                         |
|    |                                                                  | 14 | Do you have policy recommendations to maximize the use of HTA?                    |
|    |                                                                  | 15 | Do you have other policy recommendations for prescribing drugs?                   |
| 4  | Obstruction and promoting factors of HTA                         | 16 | What is/are the advantages using HTA in Medicine Policy?                          |
|    |                                                                  | 17 | What is/are the disadvantages using HTA in Medicine Policy?                       |
|    |                                                                  | 18 | What is/are the facilitators implementing HTA in medicines?                       |
|    |                                                                  | 19 | What is/are the barriers implementing HTA in medicines?                           |
|    |                                                                  | 20 | What should other stakeholders do to solve them? And Which?                       |
|    |                                                                  | 21 | What should the government do?                                                    |
| 5  | The biggest burden of disease and medicine expenditure           | 22 | What is the largest disease in Indonesia                                          |
|    |                                                                  | 23 | How much money is allocated for medicines in National Health System?              |
|    |                                                                  | 24 | What medicine are allocated more? (Why)                                           |
| 6  | Prescription outside of NF                                       | 25 | Have you ever received drugs prescription outside NF (How frequently and why)?    |
|    |                                                                  | 26 | which medicines do you receive often inside NF?                                   |
|    |                                                                  | 27 | Do you agree when doctors prescribe medicines outside NF? Why?                    |
